1 **Cold acclimation alters the connective tissue content of the zebrafish (*Danio rerio*) heart**

2

3

4

5 Amy C. Johnson, Andy J. Turko, Jordan M. Klaiman, Elizabeth F. Johnston, Todd E. Gillis

6

7 Department of Integrative Biology, University of Guelph; Guelph, Ontario, Canada.

8

9

10

11 \*Address correspondence to:

12 Todd E. Gillis, PhD

13 Department of Integrative Biology

14 University of Guelph

15 Guelph, ON, N1G-2W1

16 Canada

17 email: [tgillis@uoguelph.ca](mailto:tgillis@uoguelph.ca)

18 Tel: 1-519-824-4120 x58786

19 [http://www.uoguelph.ca/ib/faculty/faculty\\_gillis.shtml](http://www.uoguelph.ca/ib/faculty/faculty_gillis.shtml)

20

**1 SUMMARY**

2 Thermal acclimation can alter cardiac function and morphology in a number of fish species, but  
3 little is known about the regulation of these changes. The purpose of the current study was to  
4 determine how cold acclimation affects zebrafish (*Danio rerio*) cardiac morphology, collagen  
5 composition, and connective tissue regulation. Heart volume, the thickness of the compact  
6 myocardium, collagen content, and collagen fiber composition were compared between control  
7 (27°C) and cold acclimated (20°C) zebrafish using serially sectioned hearts stained with  
8 picrosirius red. Collagen content and fiber composition of the pericardial membrane were also  
9 examined. Cold acclimation did not affect the volume of the contracted heart, however there was  
10 a significant decrease in the thickness of the compact myocardium. There was also a decrease in  
11 the collagen content of the compact myocardium and in amount of thick collagen fibers  
12 throughout the heart. Cold-acclimated zebrafish also increased expression of the gene transcript  
13 for matrix metalloproteinase 2, matrix metalloproteinase 9, tissue inhibitor of metalloproteinase  
14 2, and collagen Type 1  $\alpha$ 1. We propose that the reduction in the thickness of the compact  
15 myocardium as well as the change in collagen content may help to maintain the compliance of  
16 the ventricle as temperatures decrease. Together, these results clearly demonstrate that the  
17 zebrafish heart undergoes significant remodelling in response to cold acclimation.

18

19

## 1 INTRODUCTION

2 Cardiac remodelling in vertebrates can be either pathological or physiological. Pathological  
3 remodelling such as left ventricular hypertrophy and cardiac fibrosis occurs in the human heart  
4 following myocardial infarction, which leads to diastolic dysfunction and eventual failure (Jalil et  
5 al., 1988; Jalil et al., 1989; Nelson et al., 2008; Pauschinger et al., 1999). Physiological  
6 remodelling of the heart, including cardiac hypertrophy and increased contractile function, occurs  
7 in most vertebrates with exercise (Diffie et al., 2003; Natali et al., 2002; Zaidi et al., 2013) and in  
8 some species of fish with cold acclimation (Farrell et al., 1988a; Klaiman et al., 2011; Tsukuda  
9 and Kihara, 1989). In cold acclimated fish hearts, the increase in the amount of contractile  
10 machinery is thought to alleviate the loss of contractile strength caused by low temperature as  
11 well as to offset the increased load on the heart caused by an increase in blood viscosity (Graham  
12 and Farrell, 1989; Klaiman et al., 2011). Cold acclimation has also been found to increase the  
13 amount of connective tissue in the heart of male rainbow trout (*Oncorhynchus mykiss*) while  
14 warm acclimation caused cardiac atrophy and a decrease in cardiac connective tissue (Klaiman et  
15 al., 2011). These findings suggest that trout can reversibly remodel their hearts, and most  
16 interestingly, are able to degrade cardiac connective tissue. This ability has not been documented  
17 in any other vertebrate under normal physiological conditions.

18 Increased amounts of cardiac connective tissue are often associated with diastolic  
19 dysfunction and other cardiac myopathies, due to stiffening of the myocardium (Jalil et al., 1988;  
20 Jalil et al., 1989; Nelson et al., 2008; Pauschinger et al., 1999). Such changes have been reported  
21 in the hearts of patients suffering from cardiac hypertension, dilated cardiomyopathy and chronic  
22 congestive heart failure (Jalil et al., 1988; Jalil et al., 1989; Marijianowski et al., 1995; Nelson et  
23 al., 2008; Pauschinger et al., 1999). Changes in the thickness or composition of collagen fibers in  
24 the ventricle can also affect myocardial stiffness. For example, an increase in the ratio of Type  
25 I:Type III collagen results in increased myocardial stiffness as Type I collagen is less extensible  
26 than Type III and has greater tensile strength (Junqueira et al., 1978); Marijianowski et al., 1995;  
27 (Pauschinger et al., 1999). One logical strategy to improve cardiac function in patients with  
28 diastolic dysfunction is to reduce or modify the connective tissue in the heart. By studying the  
29 ability of fish species to reversibly remodel their hearts and reduce cardiac connective tissue we  
30 may gain insight into how such a strategy could be engineered.

1           The relative amount and type of connective tissue present in the cardiac extracellular  
2 matrix (ECM) is partially regulated by matrix metalloproteinases (MMPs) (Visse and Nagase,  
3 2003). MMPs are a family of zinc-dependent endopeptidases that are involved in the catabolism  
4 of ECM proteins. In fish, MMP13 degrades collagen into gelatin by catalyzing the hydrolysis  
5 process (Hillegass et al., 2007). MMP2 and MMP9 then digest this hydrolyzed collagen (gelatin)  
6 into waste products that are removed from the body (Li et al., 2002) (Kubota et al., 2003). The  
7 activity of all MMPs is regulated in part by the tissue inhibitor of metalloproteinase (TIMP),  
8 which binds to the MMP proforms and can ultimately reduce the rate of connective tissue  
9 degradation (Willenbrock et al., 1993).

10           One potential model for examining the regulation of cardiac connective tissue is the  
11 zebrafish (*Danio rerio*). This species is becoming an increasingly useful model for studying  
12 cardiac growth and development in vertebrates (Grunwald and Eisen, 2002; Zhen et al., 2012).  
13 Zebrafish live in an environment where water temperatures can seasonally vary between 16°C  
14 and 38°C (Lopez-Olmeda and Sanchez-Vazquez, 2011), but it is not known if they undergo  
15 cardiac remodelling in response to changes in temperature. Recent work has demonstrated that  
16 cold acclimation of zebrafish increases the maximal metabolic rate as well the sustained  
17 swimming performance (Little et al., 2013) but does not affect the resting heart rate (Little and  
18 Seebacher, 2013). Together these studies indicate that zebrafish are effectively compensating for  
19 the thermodynamic affects of low temperature on normal physiological processes.

20           The purpose of this study was to investigate how the morphology and composition of the  
21 zebrafish heart is affected by cold acclimation. Male zebrafish were maintained at 27 °C (control)  
22 or acclimated to 20 °C (cold acclimated), and then assessed for changes in cardiac morphology.  
23 These temperatures were chosen as 27 °C is what the zebrafish are commonly reared at under  
24 laboratory conditions (Westerfield, 2007) and 20 °C is approaching the minimal temperature at  
25 which these fish are found in the natural environment (Lopez-Olmeda and Sanchez-Vazquez,  
26 2011). Cardiac volume and the thickness of the compact myocardium were measured using light  
27 microscopy. Collagen content and collagen fiber composition of the compact and spongy  
28 myocardium where also quantified. In addition, we examined the connective tissue content of the  
29 pericardial membrane, as this structure plays an important role controlling diastolic function in  
30 teleosts (Farrell et al., 1988b). Finally, the expression of gene transcripts for key MMPs (*MMP2*,  
31 *MMP9*, *MMP13*), the inhibitor *TIMP2A* and for collagen Type 1  $\alpha$ 1 (Collagen, Type 1  $\alpha$ 1

1 (*COL1A1*), and Collagen, Type 1  $\alpha 2$  (*COL1A2*)) were characterized in the heart using  
2 quantitative PCR. The expression of transcript for collagen type III was not examined, as the  
3 sequence of this gene has not been identified in the zebrafish genome. In fish, TIMP2 is the  
4 dominant TIMP inhibitor of metalloproteinases (Hillegass et al., 2007) and *TIMP2A* is the  
5 transcript for the protein. This analysis was completed to examine the cellular processes that  
6 regulate collagen content.

7 We tested the hypothesis that cold acclimation of zebrafish would cause significant  
8 remodelling of the morphology and collagen content of the heart to compensate for decreased  
9 contractile strength and increased blood viscosity. It was predicted that cold acclimation would  
10 cause an increase in relative heart size, a decrease in the thickness of the compact myocardium  
11 and an increase in the amount of connective tissue throughout the heart.

## 12 13 **RESULTS**

### 14 *Morphological characteristics*

15 Table 1 summarizes the effect of cold acclimation on zebrafish body and heart morphology.  
16 There was no difference in fish length nor in the average heart volume between the cold  
17 acclimated and control groups ( $P > 0.05$ ). It should be mentioned that both formalin fixation and  
18 paraffin embedding cause tissue shrinkage. However, this does not affect the comparison as all  
19 hearts were treated identically, but the absolute volumes we report are likely underestimates of  
20 actual heart size (by ~15-30%) (Carson and Hladik, 2009). The thickness of the compact layer in  
21 the cold acclimated group was significantly thinner (~ 30%) than that of the control group ( $P <$   
22  $0.05$ ) (Table 1, Fig.1). Cold acclimation also caused the collagen content of the compact  
23 myocardium to decrease from  $22.8 \pm 3.0\%$  to  $13.1 \pm 2.7\%$  ( $P < 0.05$ ). In cross-sections through  
24 the middle of the hearts from the control group, compact myocardium equaled  $40.3 \pm 2.6 \mu\text{m}^2$   
25 representing  $10.0 \pm 0.6 \%$  of the total myocardial area. Of this,  $9.1 \pm 1.8 \mu\text{m}^2$  was calculated to be  
26 composed of collagen. In the cold acclimated group, compact myocardium equaled  $27.0 \pm 1.2$   
27  $\mu\text{m}^2$ , equaling  $7.7 \pm 0.4 \%$  of the total area of the heart. Collagen was calculated to compose  $3.3 \pm$   
28  $0.6 \mu\text{m}^2$  of the compact myocardium in the cold acclimated group. The reduction in the area of  
29 the compact myocardium and in the proportion that it makes up of the cross-section was  
30 statistically significant ( $P < 0.05$ ). The decrease in collagen content caused by cold acclimation,  
31 equal to 64%, was statistically significant ( $P < 0.05$ ).

1 Cold acclimation did not affect the proportion or calculated area of the middle cross-  
2 section that was composed of spongy myocardium (Table 2). Cold acclimation caused collagen  
3 content in the spongy myocardium to decrease by 39% (Table 1;  $P = 0.1$ ).

#### 4 5 ***Collagen composition***

6 Cold acclimation significantly affected the collagen fiber composition in both the compact and  
7 spongy myocardium. The color of collagen fibers stained with picrosirius red and viewed with  
8 polarized light depends upon thickness; as fiber thickness or density increases, the color changes  
9 from green to yellow to orange to red (Hiss et al., 1988; Junqueira et al., 1982). In the compact  
10 myocardium, when collagen fiber type was calculated as a percentage of the total, cold  
11 acclimation caused a 31% decrease in the relative proportion of red collagen fibers ( $P = 0.07$ ).  
12 The proportion of yellow collagen fibers and green collagen fibers increased 145% ( $P < 0.05$ ) and  
13 143% ( $P < 0.05$ ), respectively (Fig. 2A). In the spongy myocardium, cold acclimation caused the  
14 proportion of the thick red collagen fibers to decrease by 35% ( $P = 0.06$ ) and for the yellow and  
15 green collagen fibers to increase 96% ( $P < 0.05$ ) and 86% ( $P = 0.08$ ), respectively (Fig. 2A).  
16 There was no change in the proportion of the orange collagen fibers in either the spongy or  
17 compact myocardium. Finally, Junqueira et al. (1978) suggested that collagen fibers that appear  
18 red, orange or yellow are composed of Type I collagen while fibers that appear green are  
19 composed of Type III collagen. Therefore, we calculated the ratio of red, orange, and yellow  
20 fibers: green fibers to estimate the ratio of Type I:Type III collagen. We found that this ratio  
21 decreased by 85% ( $p < 0.05$ ) in the spongy myocardium and by 81% ( $P < 0.05$ ) in the compact  
22 myocardium (Table 2). Caution must be taken in interpreting these results as this method may  
23 identify an immature, thin type I fiber as type III (Rich and Whittaker, 2005) however, these  
24 result clearly demonstrate that the proportion of thick fibers are decreasing in the heart with cold  
25 acclimation.

26 When collagen fiber compositions were converted into cross-sectional area, we found that  
27 the change in collagen content and fiber composition was primarily due to a decrease in red  
28 collagen fibers. In the compact myocardium, the area occupied by red collagen fibers decreased  
29 from  $4.1 \pm 1.4 \mu\text{m}^2$  to  $0.8 \pm 0.2 \mu\text{m}^2$  ( $P < 0.05$ ) while in the spongy myocardium the area  
30 occupied by red collagen fibers decreased from  $29.3 \pm 7.9 \mu\text{m}^2$  to  $12.3 \pm 3.8 \mu\text{m}^2$  ( $P = 0.07$ )  
31 (Table 2). These represent reductions of 80% and 58%, respectively.

1           There was no difference in collagen composition of the pericardial membrane between the  
2 control and cold acclimated fish ( $61.1 \pm 3.1$  % and  $51.6 \pm 7.4$  %, respectively;  $P > 0.05$ ). There  
3 was also no change in the relative proportion of the different fiber types.

#### 4 5 **Gene expression**

6 The expression of gene transcripts for *MMP2*, *MMP9*, *COL1A1* and *TIMP2* were significantly up  
7 regulated in cold-acclimated fish ( $P < 0.05$ ) (Fig. 3). These increases were 12.0 fold for *MMP2*,  
8 2.3 fold for *MMP9*, 3.3 fold for *COL1A1* and 1.9 fold for *TIMP2*. The transcript abundance for  
9 *COL1A2* and *MMP13* were not affected by cold acclimation ( $P > 0.05$ ; Fig. 3C, E). *MMP13*  
10 demonstrated the highest overall expression (normalized to *EF1 $\alpha$* ) in both control and cold  
11 groups as compared to other genes, while *COL1A1* had the lowest transcript abundance across all  
12 groups. The expression of the housekeeping gene *EF1 $\alpha$*  did not change with cold acclimation.

#### 13 14 **DISCUSSION**

15 Our results indicate that zebrafish remodel cardiac morphology and ECM composition in  
16 response to cold acclimation. These changes include a decrease in the thickness of the compact  
17 layer, a reduction in collagen content of the compact myocardium, and a decrease in the  
18 proportion of thick collagen fibers throughout both myocardial layers. The decrease in collagen  
19 content correlated with an increase in the expression of *MMP2* and *MMP9*. We propose that these  
20 changes help to maintain the compliance of the heart at low temperatures so that cardiac output  
21 can be maintained.

#### 22 23 **Changes in gross morphology of the heart**

24 The lack of an overall hypertrophic response with cold acclimation was not expected, as other  
25 fish that remain active during cold acclimation demonstrate cardiac hypertrophy (Klaiman et al.,  
26 2011). We have recently demonstrated that cold induced cardiac hypertrophy in the trout is due to  
27 an increase in the spongy myocardium (Klaiman et al., 2011). Spongy myocardium contains  
28 multiple lacunae that fill with blood during diastole. An increase in the spongy myocardium will  
29 therefore increase the amount of blood pumped per beat (Klaiman et al., 2011). Previous work  
30 suggests that such changes are responsible for cold acclimated (5 °C) trout having a greater, or  
31 equal, stroke volume compared to warm acclimated (15 °C) fish (Graham and Farrell, 1989). If

1 heart rate is maintained in zebrafish with cold acclimation, as indicated by Little and Seebacher  
2 (Little and Seebacher, 2013), it may not be necessary for these fish to increase stroke volume to  
3 maintain cardiac output. This could explain why cardiac hypertrophy was not seen.

4 A reduction in temperature increases the passive viscoelastic properties of muscle leading  
5 to an increase in muscle stiffness (Mutungi and Ranatunga, 1998). In the heart, such an effect has  
6 the potential to decrease ventricle compliance and cause a reduction in diastolic function. One  
7 feature of the zebrafish heart that may play a role in compensating for the influence of low  
8 temperature on ventricle compliance is the compact myocardium. The compact myocardium is a  
9 layer of densely packed cells on the outside of the ventricle that helps to provide biomechanical  
10 support to the spongy myocardium (Hu et al., 2001; Pieperhoff et al., 2009). In this position it has  
11 the ability to influence the extension of the ventricle. We propose that the reduction in the  
12 thickness of the compact layer in zebrafish with cold acclimation is to help increase ventricle  
13 compliance so that stroke volume can be maintained at low physiological temperature. The  
14 decrease in the thickness of the compact myocardium in the current study corresponds with  
15 previous research that found the same response in cold acclimated trout (Farrell et al., 1988a;  
16 Klaiman et al., 2011). This suggests that such a change to the thickness of the compact  
17 myocardium may be a common response in fish that seasonally acclimate to low temperatures.

### 19 *Collagen*

20 A change in myocardial collagen content alters the biomechanical characteristics of the muscle  
21 (Jalil et al. 1988, (Jalil et al., 1989). For example an increase in collagen content increases the  
22 stiffness of the muscle (Jalil et al., 1989). The decrease in the collagen content of the compact  
23 myocardium with cold acclimation may, therefore, be another compensation to help maintain  
24 ventricle compliance at low physiological temperatures. Furthermore, the 39% decrease in total  
25 collagen content that we observed in the spongy myocardium, while not statistically significant  
26 ( $P = 0.1$ ), suggests that a common strategy is used in both myocardial layers. The decrease in  
27 collagen content in the zebrafish heart with cold acclimation in the current study contradicts  
28 findings in rainbow trout (Klaiman et al., 2011). In trout, however, the increase in connective  
29 tissue content with cold acclimation is accompanied by cardiac hypertrophy, a strategy thought to  
30 help increase stroke volume. While these responses differ, it is clear that trout and zebrafish use  
31 phenotypically flexible hearts to remain active in habitats that vary considerably in temperature



1 throughout the year (Klaiman et al., 2011; Lopez-Olmeda and Sanchez-Vazquez, 2011).

2 In addition to changes in overall collagen content, we found that the hearts of cold  
3 acclimated trout had significantly thinner collagen fibers and a decreased ratio of Type I:Type III  
4 collagen. In human hearts, increased collagen fiber thickness and increased Type I:Type III  
5 collagen are associated with stiffening of the myocardium (Jalil et al., 1988; Jalil et al., 1989;  
6 Nelson et al., 2008; Pauschinger et al., 1999). Therefore, the changes observed in collagen fiber  
7 composition in the trout heart should decrease ventricle stiffness and as a result help compensate  
8 for the effect of low temperature on ventricle compliance. However, future studies are required to  
9 determine if the change in collagen content and composition in the zebrafish heart leads to  
10 changes in the passive properties of the heart.

11 We observed no collagen remodelling of the pericardial membrane in response to cold  
12 acclimation. This membrane was examined as it assists with atrial filling in teleost fish and acts  
13 to limit distension of the ventricle during diastole (Farrell et al., 1988b). It was thought that a  
14 change in collagen content could be a strategy to reduce membrane stiffness and as a result,  
15 enable a greater stroke volume. This does not however appear to be the case.

16

### 17 ***Gene expression***

18 The increased expression of the gene transcripts for *MMP2* and *MMP9* after four weeks of cold  
19 acclimation suggests that the heart is increasing its capacity to remove collagen from the ECM.  
20 The observed decrease in cardiac collagen content with cold acclimation supports this idea. Long  
21 et al. (Long et al., 2013) demonstrated that the expression of *MMP13* is highly up-regulated in  
22 zebrafish hearts in the first 24h of cold stress. As hearts were sampled in the current study at 4  
23 weeks it is not surprising that we did not observe a similar increase. However, the endogenous  
24 levels of the transcript for *MMP13* were greater than that for either *MMP2* or *MMP9* suggesting  
25 that the heart maintains high levels of this protease.

26 While cold acclimation increased gene transcripts for gelatinases in the zebrafish heart,  
27 this result may not be entirely predictive of MMP activity. The increase in the expression of gene  
28 transcripts for *TIMP2* indicates that there may also be an attempt to regulate MMP activity. This  
29 idea is supported by Li et al. (2002), who suggested that an increase in the production of MMPs,  
30 without a counterbalancing increase in TIMPs, leads to functional defects. It was also interesting  
31 that the transcript for *COL1A1* (but not *COL1A2*) was up-regulated in the cold acclimated fish,

1 despite the observation that collagen content decreased overall. This increase may be associated  
2 with the active maintenance of collagen content in the heart. To tease apart the timing of events  
3 in the remodelling of collagen content in the heart, future studies need to quantify the expression  
4 of these genes at multiple stages during the acclimation period.

5 In the control fish, the compact myocardium made up ~10% of the total area and ~7%  
6 in the cold acclimated group. By isolating mRNA from the entire heart it is likely that a majority  
7 of the transcripts that were amplified in the qPCR protocols were from the spongy layer.  
8 However, the histological changes that were characterized in the spongy layer (decrease in red  
9 collagen fibers and in Type I:Type III collagen) were also seen in the compact layer. In addition,  
10 while the decrease in collagen content was significant in the compact myocardium there was also  
11 a 39% reduction in the mean value in the spongy myocardium. Therefore, it is likely that the  
12 changes in transcript levels characterized in the entire heart were reflective of what was occurring  
13 at the molecular level in both myocardial layers.

### 14 15 ***Conclusions and perspectives***

16 The current study indicates that the morphology and composition of the zebrafish heart  
17 changes in response to cold acclimation. Specifically, these changes include a reduction in the  
18 thickness of the compact myocardium, as well as a reduction in the collagen content and in the  
19 relative proportion of thick collagen fibers (Type I) throughout the heart. Together these changes  
20 may help to compensate for the direct effect of low temperature on the compliance of the  
21 ventricle and therefore allow cardiac output to be maintained. This study also indicates that  
22 zebrafish are a good model to study the molecular basis of cold induced cardiac remodelling in  
23 fish. This remarkable ability has the potential to increase our understanding of the regulation of  
24 collagen deposition in the human heart. Being able to reduce collagen content in the diseased  
25 heart, specifically Type I fibers, as zebrafish are able to with cold acclimation would be of a  
26 significant benefit.

## 27 28 **METHODS**

### 29 ***Experimental Animals***

30 Adult male zebrafish (*D. rerio*), maintained in a colony at the Hagen Aqualab, University of  
31 Guelph, Ontario, were transferred into two 30 L recirculating tanks (each holding 40 fish) in an

1 environmental chamber. The water in these tanks was held at 27°C using emersion heaters  
2 connected to a computer controlled environmental control system. Fish were held at 27 °C for  
3 four weeks prior to experimentation. The control tank was maintained at 27°C for the duration of  
4 the experiment. The temperature of the second tank (cold acclimated fish) was decreased 1°C per  
5 day from 27°C to 20°C using the environmental control system (Klaiman et al., 2011; McClelland  
6 et al., 2006), and then held at 20°C for four weeks prior to sampling. Fish were fed *ad libitum*  
7 once per day for the duration of the experiment. After the acclimation period, zebrafish were  
8 euthanized using buffered tricaine methanesulfonate (45 mg/L). The thoracic cavity was  
9 immediately opened and the heart was rinsed with physiological saline [in mmol l<sup>-1</sup>: 94 NaCl, 24  
10 NaCO<sub>3</sub>, 5 KCl, 1 MgSO<sub>4</sub>, 1 Na<sub>2</sub>HPO<sub>4</sub>, 0.7 CaCl<sub>2</sub>, pH 7.6 at 15°C] and then bathed in 1 M KCl to  
11 cause maximal contraction prior to fixation. Only males were used in this study as Klaiman et al.  
12 (2011) demonstrated that cold acclimation did not cause cardiac hypertrophy or induce an  
13 increase in connective content in female trout. The University of Guelph's Animal Care  
14 Committee approved care and use of all experimental animals, as per the principles of the  
15 Canadian Council for Animal Care.

### 17 ***Histology***

18 The entire thorax region of each fish, containing the heart, was fixed in 2% buffered formalin (24  
19 h, 4°C), decalcified (1 h, 20°C; Surgipath Decalcifier II, Winnipeg, MB, Canada), and stored in  
20 70% ethanol. Each thorax was embedded in paraffin wax and 5 µm transverse sections were  
21 made from the entire tissue (Chablais et al., 2011; Klaiman et al., 2011)). Every 5<sup>th</sup> section was  
22 mounted on a glass slide, resulting in an average of 33.3 ± 1.2 (mean ± s.e.m.) sections per heart.  
23 Sections were stained for collagen with picosirius red (Electron Microscopy Sciences, Hatfield,  
24 PA, U.S.A.) (Junqueira et al., 1979a; Junqueira et al., 1979b; Rich and Whittaker, 2005). A  
25 Nikon Ti microscope (Nikon, Melville, NY, U.S.A.) was used to take bright field and polarized  
26 light images of the ventricle sections and surrounding pericardial membrane. Bright field images  
27 were used to measure heart size (Fig. 1A) and compact layer thickness (Fig. 1B and 1C). The  
28 polarized images were used to analyze collagen content and fiber thickness in the spongy  
29 myocardium, compact myocardium and pericardial membrane (Rich and Whittaker, 2005) (Fig.  
30 4). As the thickness of fibers imaged in this manner increases, the color changes from green to  
31 yellow to orange to red (Hiss et al., 1988; Junqueira et al., 1982). The cross-sectional area of each

1 heart section was quantified using ImageJ (U. S. National Institutes of Health, Bethesda,  
 2 Maryland, USA), and these area measurements were used to calculate the heart volume using a  
 3 trapezoidal estimation equation (Rosen and Harry, 1990):

4

$$\text{Volume} = \sum_{i=1}^{n-1} \frac{(y_i + y_{i+1})}{2} (t + d)$$

5 Where:

$n$  = total number of sections

6

$y$  = cross sectional area of the  $i$ -th section through the heart

7

$t$  = section thickness (=5 $\mu$ m)

8

$d$  = distance between sections (=20 $\mu$ m)

9

10 The average thickness of the compact layer was determined using ImageJ software at four  
 11 random locations from five sections per heart (Klaiman et al., 2011). The amount of collagen in  
 12 the spongy myocardium, compact myocardium and pericardial membrane was determined from  
 13 the same five sections per heart as described by Rich and Whittaker (2005). Briefly, using  
 14 ImageJ, 256-colour polarized images were transformed into their hue component and the colour  
 15 of each pixel was automatically determined using the histogram function. The percentage of  
 16 collagen in each layer of the heart or membrane was calculated by dividing the total number of  
 17 collagen-coloured pixels (defined by Rich and Whittaker, 2005) by the total number of pixels in  
 18 that region of the heart. Lastly, the proportion of each collagen fiber colour (red, orange, yellow  
 19 and green fibers) in the compact and spongy layers was determined by dividing the number of  
 20 pixels of that fiber colour by the total number of collagen-coloured pixels in each layer.

21

### 22 ***Calculation of area and connective tissue content of spongy and compact myocardium***

23 The area of the spongy myocardium was measured using ImageJ in a cross section through the  
 24 middle of the heart (a section in which the atrial ventricular valve was clearly visible). This value  
 25 was then subtracted from the total cross sectional area of the section to determine the area of the  
 26 compact myocardium. The area of the spongy and compact myocardium that was composed of  
 27 connective tissue was calculated using the measured percentage value from the polarized light  
 28 images for each myocardium type.

29

### 1 ***Quantitative real-time PCR***

2 The transcript abundance of six genes associated with connective tissue regulation (*MMP2*,  
3 *MMP9*, *MMP13*, *COL1A1*, *COL1A2*, *TIMP2*) were quantified in the hearts of the fish in the  
4 control and cold acclimated groups (n=3-5; 5 pooled hearts/n). Total RNA was extracted from  
5 tissue homogenized in Trizol (Life Technologies, Grand Island, NY) according to manufacturer's  
6 instructions, and quantified using a Nanodrop 8000 (ThermoFisher Scientific, Ottawa, ON,  
7 Canada). One microgram of total RNA was treated with DNase I (Sigma) and used to synthesize  
8 cDNA with the High Capacity cDNA Synthesis Kit (Life Technologies) following  
9 manufacturers' instructions. Duplicate cDNA reactions in which the Multiscribe RT enzyme was  
10 omitted were included for 10% of total samples, chosen randomly, to verify the efficacy of the  
11 DNase treatment. Transcript abundances were measured in duplicate reactions on a StepOne Plus  
12 (Life Technologies) using default cycling conditions and a dissociation cycle. Each 15µl reaction  
13 contained 1xPerfeCta Fast SYBR Green Master Mix (Quanta BioSciences), 200nM each gene-  
14 specific primer (Table 3) and 1:15 vol:vol cDNA. Custom oligos for *EF1α*, *COL1A1*, *TIMP2*,  
15 *COL1A2*, *COL1A3* and *MMP2* were designed using Primer 3. Gene specific primers for *MMP13*  
16 and *MMP9* were adopted from Hillegass (2007) and Wu et al. (2010), respectively. All reactions  
17 generated a single-peaked dissociation curve at the predicted amplicon melting temperature. The  
18 mRNA abundance of each gene was quantified by fitting the threshold cycle to the antilog of  
19 standard curves prepared from serially diluted cDNA. Isoform transcript abundance was  
20 normalized to the mRNA abundance of *elongation factor 1α* (*EF1α*; GenBank Accession  
21 Number: AY422992.1; forward primer: TCTCAGGCTGACTGTGCTGT; reverse primer:  
22 GGTCTGTCCGTTCTTGGAGA). All non-reverse transcribed control samples failed to amplify.

### 24 ***Statistical Analysis***

25 Heart volume, area, and volume of compact and spongy myocardium, area and volume of  
26 connective tissue in spongy and compact myocardium, compact layer thickness, percentage of  
27 collagen in each layer, and proportion of collagen fiber types in each layer were each compared  
28 between control and cold acclimated fish with Student's t-tests. For each gene, a Student's two-  
29 tailed t-test was used to compare differences in transcript abundance between control and cold  
30 acclimated fish. A Shapiro-Wilk test was used to determine if data was normally distributed, and  
31 any group that did not fit the assumption of normality was log-transformed prior to analysis. A

1 critical  $\alpha = 0.05$  was used throughout. All data is presented as mean  $\pm$  S.E.M.

2

3 **ACKNOWLEDGMENTS**

4 This work was supported by a Discovery Grant from the Natural Sciences and Engineering  
5 Research Council (NSERC) to TEG and NSERC Canadian Graduate Scholarships to JMK and  
6 AJT. The Authors would like to thank Dr. A.L. Alderman for comments on an earlier version of  
7 the MS.

8

1 **References**

- 2           **Chablais, F., Veit, J., Rainer, G. and Jazwinska, A.** (2011). The zebrafish heart  
3 regenerates after cryoinjury-induced myocardial infarction. *Bmc Developmental Biology* **11**.
- 4           **Diffie, G. M., Seversen, E. A., Stein, T. D. and Johnson, J. A.** (2003). Microarray  
5 expression analysis of effects of exercise training: increase in atrial MLC-1 in rat ventricles. *Am J*  
6 *Physiol Heart Circ Physiol* **284**, H830-7.
- 7           **Farrell, A. P., Hammons, A. M., Graham, M. S. and Tibbits, G. F.** (1988a). Cardiac  
8 Growth in Rainbow-Trout, *Salmo-Gairdneri*. *Canadian Journal of Zoology-Revue Canadienne*  
9 *De Zoologie* **66**, 2368-2373.
- 10          **Farrell, A. P., Johansen, J. A. and Graham, M. S.** (1988b). The Role of the  
11 Pericardium in Cardiac-Performance of the Trout (*Salmo-Gairdneri*). *Physiological Zoology* **61**,  
12 213-221.
- 13          **Graham, M. S. and Farrell, A. P.** (1989). The Effect of Temperature-Acclimation and  
14 Adrenaline on the Performance of a Perfused Trout Heart. *Physiological Zoology* **62**, 38-61.
- 15          **Grunwald, D. J. and Eisen, J. S.** (2002). Headwaters of the zebrafish -- emergence of a  
16 new model vertebrate. *Nature reviews. Genetics* **3**, 717-24.
- 17          **Hillegass, J. M., Villano, C. M., Cooper, K. R. and White, L. A.** (2007). Matrix  
18 metalloproteinase-13 is required for zebra fish (*Danio rerio*) development and is a target for  
19 glucocorticoids. *Toxicological sciences : an official journal of the Society of Toxicology* **100**,  
20 168-79.
- 21          **Hiss, J., Hirshberg, A., Dayan, D. F., Bubis, J. J. and Wolman, M.** (1988). Aging of  
22 Wound-Healing in an Experimental-Model in Mice. *American Journal of Forensic Medicine and*  
23 *Pathology* **9**, 310-312.
- 24          **Hu, N., Yost, H. J. and Clark, E. B.** (2001). Cardiac morphology and blood pressure in  
25 the adult zebrafish. *The Anatomical record* **264**, 1-12.
- 26          **Jalil, J. E., Doering, C. W., Janicki, J. S., Pick, R., Clark, W. A., Abrahams, C. and**  
27 **Weber, K. T.** (1988). Structural vs. contractile protein remodeling and myocardial stiffness in  
28 hypertrophied rat left ventricle. *Journal of molecular and cellular cardiology* **20**, 1179-87.
- 29          **Jalil, J. E., Doering, C. W., Janicki, J. S., Pick, R., Shroff, S. G. and Weber, K. T.**  
30 (1989). Fibrillar collagen and myocardial stiffness in the intact hypertrophied rat left ventricle.  
31 *Circulation research* **64**, 1041-50.
- 32          **Junqueira, L. C. U., Bignolas, G. and Brentani, R. R.** (1979a). Picrosirius Staining  
33 Plus Polarization Microscopy, a Specific Method for Collagen Detection in Tissue-Sections.  
34 *Histochemical Journal* **11**, 447-455.
- 35          **Junqueira, L. C. U., Bignolas, G. and Brentani, R. R.** (1979b). Simple and Sensitive  
36 Method for the Quantitative Estimation of Collagen. *Analytical Biochemistry* **94**, 96-99.
- 37          **Junqueira, L. C. U., Cossermelli, W. and Brentani, R.** (1978). Differential Staining of  
38 Collagens Type-I, Type-Ii and Type-Iii by Sirius Red and Polarization Microscopy. *Archivum*  
39 *Histologicum Japonicum* **41**, 267-274.
- 40          **Junqueira, L. C. U., Montes, G. S. and Sanchez, E. M.** (1982). The Influence of Tissue  
41 Section Thickness on the Study of Collagen by the Picrosirius-Polarization Method.  
42 *Histochemistry* **74**, 153-156.
- 43          **Klaiman, J. M., Fenna, A. J., Shiels, H. A., Macri, J. and Gillis, T. E.** (2011). Cardiac  
44 Remodeling in Fish: Strategies to Maintain Heart Function during Temperature Change. *PLoS*  
45 *One* **6**, e24464.



1           **Kubota, M., Kinoshita, M., Takeuchi, K., Kubota, S., Toyohara, H. and Sakaguchi,**  
 2 **M.** (2003). Solubilization of type I collagen from fish muscle connective tissue by matrix  
 3 metalloproteinase-9 at chilled temperature. *Fisheries Science* **69**, 1053-1059.

4           **Li, J., Schwimmbeck, P. L., Tschöpe, C., Leschka, S., Husmann, L., Rutschow, S.,**  
 5 **Reichenbach, F., Noutsias, M., Kobalz, U., Poller, W. et al.** (2002). Collagen degradation in a  
 6 murine myocarditis model: relevance of matrix metalloproteinase in association with  
 7 inflammatory induction. *Cardiovascular research* **56**, 235-47.

8           **Little, A. G., Kunisue, T., Kannan, K. and Seebacher, F.** (2013). Thyroid hormone  
 9 actions are temperature-specific and regulate thermal acclimation in zebrafish (*Danio rerio*).  
 10 *BMC Biol* **11**, 26.

11           **Little, A. G. and Seebacher, F.** (2013). Thyroid hormone regulates cardiac performance  
 12 during cold acclimation in Zebrafish (*Danio rerio*). *J Exp Biol*.

13           **Long, Y., Song, G., Yan, J., He, X., Li, Q. and Cui, Z.** (2013). Transcriptomic  
 14 characterization of cold acclimation in larval zebrafish. *BMC Genomics* **14**, 612.

15           **Lopez-Olmeda, J. F. and Sanchez-Vazquez, F. J.** (2011). Thermal biology of zebrafish  
 16 (*Danio rerio*). *Journal of Thermal Biology* **36**, 91-104.

17           **Marijjanowski, M. M., Teeling, P., Mann, J. and Becker, A. E.** (1995). Dilated  
 18 cardiomyopathy is associated with an increase in the type I/type III collagen ratio: a quantitative  
 19 assessment. *Journal of the American College of Cardiology* **25**, 1263-72.

20           **McClelland, G. B., Craig, P. M., Dhekney, K. and Dipardo, S.** (2006). Temperature-  
 21 and exercise-induced gene expression and metabolic enzyme changes in skeletal muscle of adult  
 22 zebrafish (*Danio rerio*). *J Physiol* **577**, 739-51.

23           **Mutungi, G. and Ranatunga, K. W.** (1998). Temperature-dependent changes in the  
 24 viscoelasticity of intact resting mammalian (rat) fast- and slow-twitch muscle fibres. *J Physiol*  
 25 **508 ( Pt 1)**, 253-65.

26           **Natali, A. J., Wilson, L. A., Peckham, M., Turner, D. L., Harrison, S. M. and White,**  
 27 **E.** (2002). Different regional effects of voluntary exercise on the mechanical and electrical  
 28 properties of rat ventricular myocytes. *J Physiol* **541**, 863-75.

29           **Nelson, O. L., Robbins, C. T., Wu, Y. and Granzier, H.** (2008). Titin isoform  
 30 switching is a major cardiac adaptive response in hibernating grizzly bears. *American journal of*  
 31 *physiology. Heart and circulatory physiology* **295**, H366-71.

32           **Pauschinger, M., Knopf, D., Petschauer, S., Doerner, A., Poller, W., Schwimmbeck,**  
 33 **P. L., Kuhl, U. and Schultheiss, H. P.** (1999). Dilated cardiomyopathy is associated with  
 34 significant changes in collagen type I/III ratio. *Circulation* **99**, 2750-6.

35           **Pieperhoff, S., Bennett, W. and Farrell, A. P.** (2009). The intercellular organization of  
 36 the two muscular systems in the adult salmonid heart, the compact and the spongy myocardium.  
 37 *Journal of anatomy* **215**, 536-47.

38           **Rich, L. and Whittaker, P.** (2005). Collagen and Picrosirius red staining: A polarized  
 39 light assessment of fibrillar hue and spatial distribution. *Braz. J. Morphol. Sci.* **22**, 97-104.

40           **Tsukuda, H. and Kihara, M.** (1989). Effect of Hypoxia on the Isolated Heart Activity of  
 41 Thermally Acclimated Goldfish, *Carassius-Auratus*. *Comparative Biochemistry and Physiology*  
 42 *a-Physiology* **94**, 37-40.

43           **Visse, R. and Nagase, H.** (2003). Matrix metalloproteinases and tissue inhibitors of  
 44 metalloproteinases: structure, function, and biochemistry. *Circ Res* **92**, 827-39.

45           **Westerfield, M.** (2007). THE ZEBRAFISH BOOK: University of Oregon Press.



1           Willenbrock, F., Crabbe, T., Slocombe, P. M., Sutton, C. W., Docherty, A. J.,  
2   Cockett, M. I., O'Shea, M., Brocklehurst, K., Phillips, I. R. and Murphy, G. (1993). The  
3   activity of the tissue inhibitors of metalloproteinases is regulated by C-terminal domain  
4   interactions: a kinetic analysis of the inhibition of gelatinase A. *Biochemistry* **32**, 4330-7.

5           Zaidi, A., Ghani, S., Sharma, R., Oxborough, D., Panoulas, V. F., Sheikh, N., Gati,  
6   S., Papadakis, M. and Sharma, S. (2013). Physiological right ventricular adaptation in elite  
7   athletes of African and Afro-Caribbean origin. *Circulation* **127**, 1783-92.

8           Zhen, Y. S., Wu, Q., Xiao, C. L., Chang, N. N., Wang, X., Lei, L., Zhu, X. and Xiong,  
9   J. W. (2012). Overlapping cardiac programs in heart development and regeneration. *Journal of*  
10   *genetics and genomics = Yi chuan xue bao* **39**, 443-9.

1  
2 Table 1. Morphological characteristics of zebrafish hearts from fish acclimated to either 27 °C  
3 (control) or 20 °C (cold acclimated).

| Group   | Fish length<br>(cm) | Heart volume<br>(mm <sup>3</sup> ) | Compact<br>myocardium<br>thickness<br>(µm) | Compact<br>myocardium<br>collagen<br>(% of tissue) | Spongy<br>myocardium<br>collagen<br>(% of tissue) |
|---------|---------------------|------------------------------------|--------------------------------------------|----------------------------------------------------|---------------------------------------------------|
| Control | 3.5 ± 0.1           | 0.21 ± 0.02                        | 9.1 ± 0.5 <sup>a</sup>                     | 23.5 ± 2.8 <sup>a</sup>                            | 15.2 ± 2.6                                        |
| Cold    | 3.3 ± 0.1           | 0.20 ± 0.01                        | 6.4 ± 0.6 <sup>b</sup>                     | 14.0 ± 2.6 <sup>b</sup>                            | 9.9 ± 1.6                                         |

4 Statistical differences between treatment groups are indicated with a different superscript letter (*P*  
5 < 0.05). The collagen values are expressed as the proportion of tissue area that was occupied by  
6 collagen.

7  
8

1 Table 2. Area occupied by compact myocardium, spongy myocardium and connective tissue in  
 2 cross section through the middle of cardiac ventricles from control (27 °C) and cold acclimated  
 3 (20 °C) zebrafish.

|                 | Cross-sectional area ( $\mu\text{m}^2$ ) | Percentage of total cross-sectional area | Area composed of connective tissue ( $\mu\text{m}^2$ ) | Percentage of cross-sectional area composed of collagen | “Type I”: ”Type III” collagen |
|-----------------|------------------------------------------|------------------------------------------|--------------------------------------------------------|---------------------------------------------------------|-------------------------------|
| Control compact | 40.3 $\pm$ 2.6 <sup>a</sup>              | 10.0 $\pm$ 0.6 <sup>a</sup>              | 9.1 $\pm$ 1.8 <sup>a</sup>                             | 22.8 $\pm$ 3.0 <sup>a</sup>                             | 43.8 $\pm$ 12.6 <sup>a</sup>  |
| Cold compact    | 27.0 $\pm$ 1.2 <sup>b</sup>              | 7.7 $\pm$ 0.4 <sup>b</sup>               | 3.3 $\pm$ 0.6 <sup>b</sup>                             | 13.1 $\pm$ 2.7 <sup>b</sup>                             | 8.2 $\pm$ 2.7 <sup>b</sup>    |
| Control spongy  | 368.6 $\pm$ 22.5                         | 90.0 $\pm$ 0.5                           | 51.9 $\pm$ 9.7                                         | 14.0 $\pm$ 2.6                                          | 27.4 $\pm$ 12.4 <sup>a</sup>  |
| Cold spongy     | 332.1 $\pm$ 19.6                         | 92.3 $\pm$ 0.3                           | 31.3 $\pm$ 6.4                                         | 9.6 $\pm$ 1.7                                           | 4.1 $\pm$ 1.6 <sup>b</sup>    |

4 Area, calculated area of cross-section of the ventricle; Percentage of total cross-sectional area,  
 5 percentage of cross-section made up of either spongy or compact myocardium. Area composed of  
 6 connective tissue, area of cross-section of compact or spongy myocardium composed of  
 7 connective tissue; Type I:Type III collagen ratio calculated by summing up the proportional  
 8 values of fibers that appeared red, orange and yellow and dividing this by the proportion of fibers  
 9 stained green. Values in the same column indicated by different superscripts are significantly  
 10 different from each other ( $P < 0.5$ ).  $N=9$  for all measurements.

11  
 12

1 Table 3. Forward and reverse primer sequences used to amplify transcripts for matrix  
 2 metalloproteinase 2 (*MMP2*), *MMP9*, *MMP13*, the tissue inhibitor of metalloproteinase (*TIMP2*)  
 3 collagen Type I,  $\alpha 1$  (*COL1A1*), and collagen Type I,  $\alpha 2$  (*COL1A2*) using qPCR.

4

| Gene          | Sequence                                                               | Amplicon size (bp) | GenBank Accession Number |
|---------------|------------------------------------------------------------------------|--------------------|--------------------------|
| <i>MMP2</i>   | <b>F</b> GCCTTAATGGTGATGGTCACA<br><b>R</b> GGTCTGTCGATG TTCAGCAG       | 132                | NM_198067                |
| <i>MMP9</i>   | <b>F</b> TGGGCACCTGCTCGTTGA<br><b>R</b> TTGGAGATGACCGCCTGC             | 172                | NM_213123.1              |
| <i>MMP13</i>  | <b>F</b> ATGGTGCAAGGCTATCCCAAGAGT<br><b>R</b> GCCTGTTGTTGGAGCCAAACTCAA | 289                | AF506756.1               |
| <i>TIMP2</i>  | <b>F</b> ATGGGGTGTGACTGCAAGAT<br><b>R</b> AGGCGTAGTGGTCAGACTGG         | 130                | NM_182874.1              |
| <i>COL1A1</i> | <b>F</b> GGCTTCAGTTCGAGTATGG<br><b>R</b> ATGCAATGCTGTTCTTGCAG          | 129                | BC161663.1               |
| <i>COL1A2</i> | <b>F</b> GGCTGCAGTAGACACACTGG<br><b>R</b> CAATGTCCAAAGGTGCAATG         | 103                | NM_182968.2              |

5 The amplicon size amplified by each primer set, as well as the GenBank accession numbers are  
 6 provided for each isoform. qPCR, quantitative PCR; F, forward primer; R, reverse primer.

7

8

9

10

1 **Figure Legends**

2 **Figure 1.**

3 Representative bright field micrographs of the zebrafish heart and of the compact myocardium in  
4 control and cold acclimated zebrafish. (A) Cross section of control zebrafish heart at low  
5 magnification. (B) Compact myocardium in heart from control zebrafish at high magnification.  
6 (C) Compact myocardium in heart from cold acclimated zebrafish at high magnification. The “\*”  
7 indicates the compact myocardium on panels B and C

8

9 **Figure 2.**

10 (A) The relative proportion of collagen fiber colours in the compact myocardium and spongy  
11 myocardium of control (27 °C) and cold (20 °C) acclimated zebrafish. Red denotes the  
12 thickest/densest fibers, while green denotes the thinnest. Proportions were calculated using  
13 measurements made in five cross sections from each heart. (B) Area, calculated as  $\mu\text{m}^2$ , occupied  
14 by each of the four collagen fiber types in the compact myocardium within the middle cross  
15 section of hearts from control and cold zebrafish. (C) Area, calculated as  $\mu\text{m}^2$ , occupied by each  
16 of the four collagen fiber types in the spongy myocardium within the middle cross section of  
17 hearts from control and cold acclimated zebrafish. Values of the same fiber type in the same  
18 myocardial layer that are significantly different between treatment groups are indicated with a  
19 “\*” ( $P < 0.05$ ). † indicates that the  $P$ -value between the two mean values for this fibre type is  $<$   
20 0.07.  $N=9$  for all measurements.

21

22 **Figure 3.**

23 The influence of cold acclimation on the expression of gene transcripts for matrix  
24 metalloproteinase 2 (*MMP2*, A), matrix metalloproteinase 9 (*MMP9*, B), matrix  
25 metalloproteinase 13 (*MMP13*, C); collagen Type I,  $\alpha 1$  (*COL1A1*, E); collagen Type I,  $\alpha 2$   
26 (*COL1A2*, F); and tissue inhibitor of metalloproteinase 2 (*TIMP2*, D). The expression of each  
27 transcript in the cold acclimated (20 °C) samples is relative to the amount of that transcript in the  
28 control group (27 °C). This value is set to 1 in each panel. Isoform transcript abundance was  
29 normalized to the mRNA abundance of *elongation factor 1 $\alpha$*  (*EF1 $\alpha$* ) \* indicates a significant  
30 effect of cold acclimation on gene expression ( $P < 0.05$ ).  $N=3-5$  for each measurement 5 pooled  
31 hearts/n).

1  
2 **Figure 4.**  
3 Histological detection of collagen deposition in heart ventricles of control zebrafish. Tissue  
4 sections were stained using picrosirius red to detect collagen. Representative low magnification  
5 brightfield (A), low magnification polarized (B), high magnification brightfield (C), and high  
6 magnification polarized (D) images are presented. Compact myocardium spongy myocardium  
7 and pericardial membrane are labeled on the figures. In the polarized images collagen fibers were  
8 red, orange, yellow or green. With this technique thick/dense fibers are detected as red, two  
9 intermediate fiber diameters, detected as orange and yellow and then thin fibers detected as green  
10 fibers.

11  
12



Figure 1. Johnson et al., submitted 2013

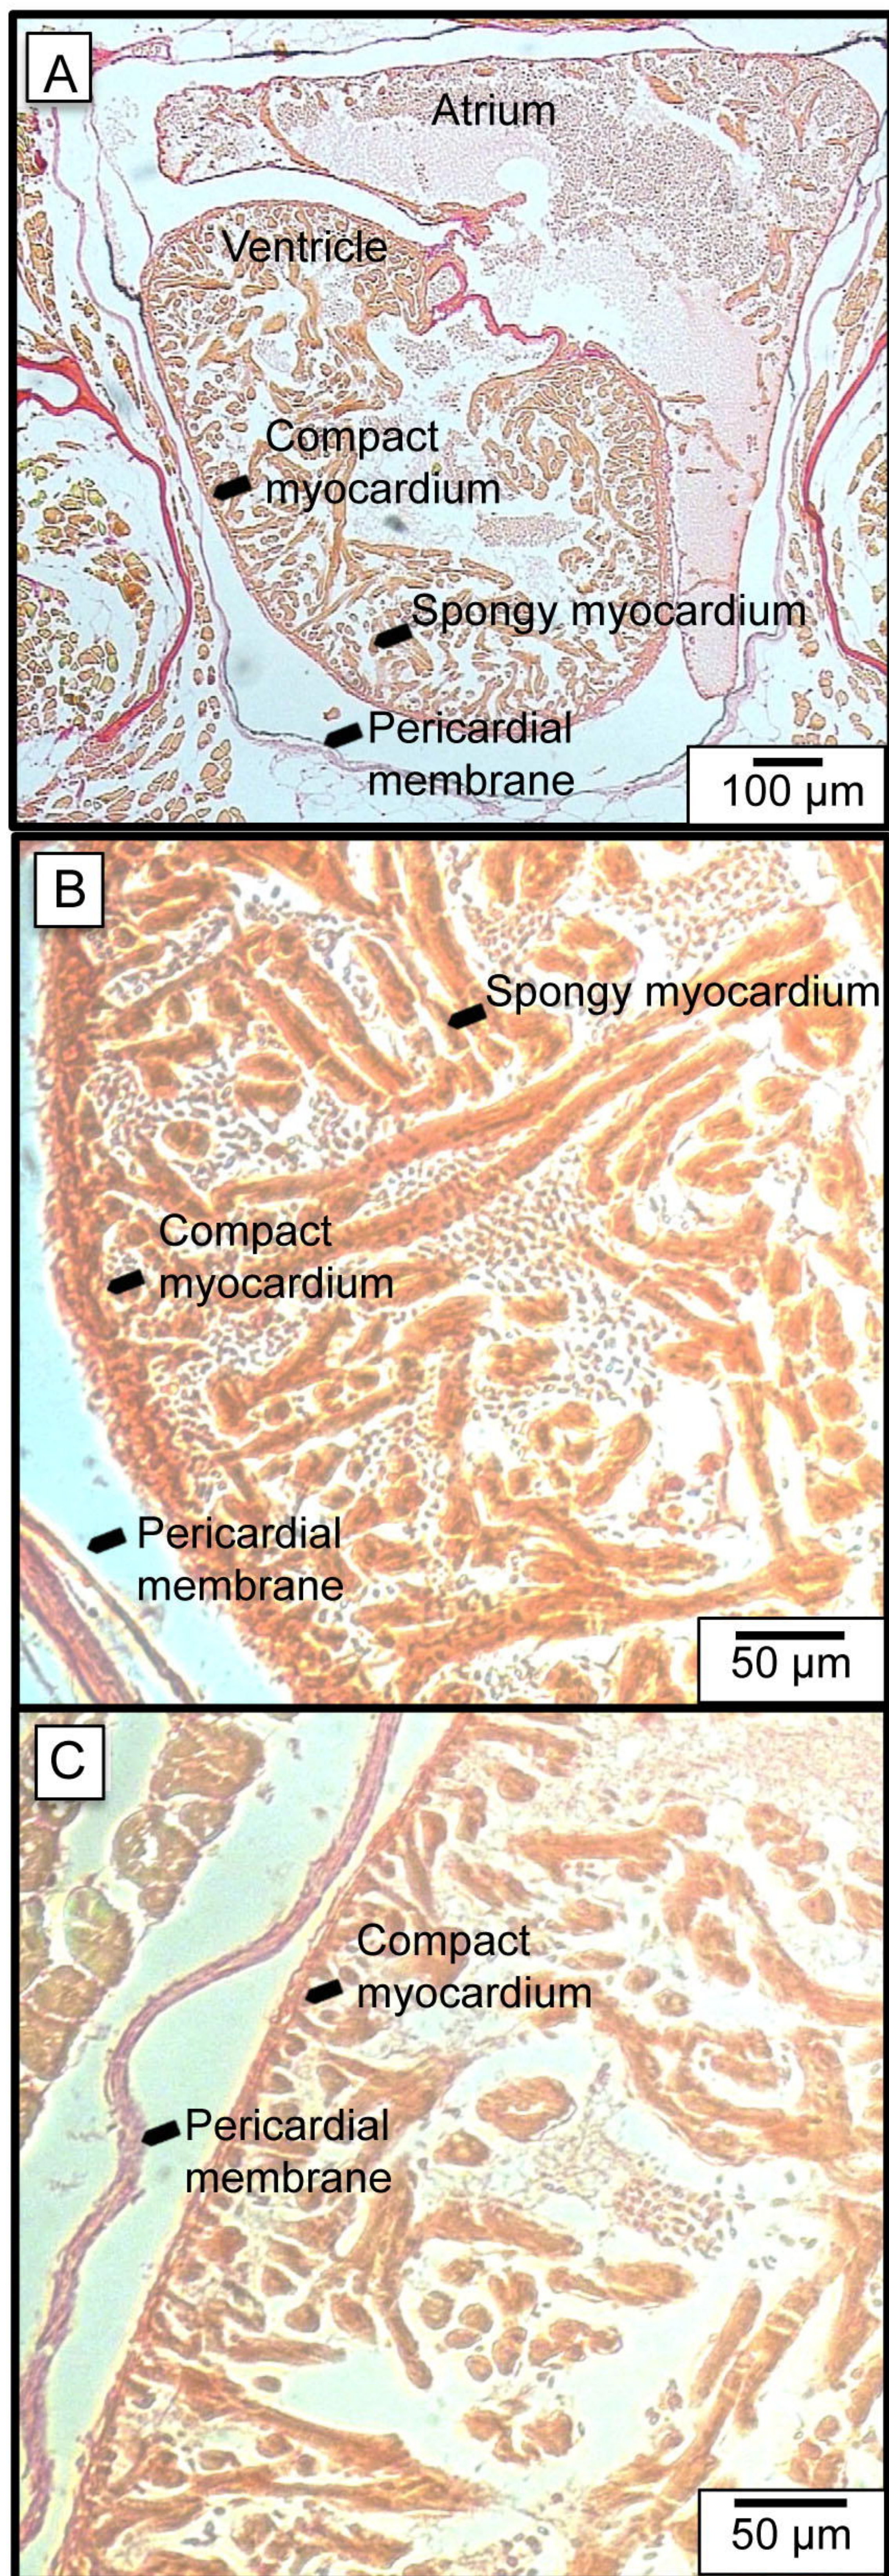



Figure 2. Johnson et al., submitted 2013

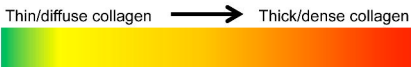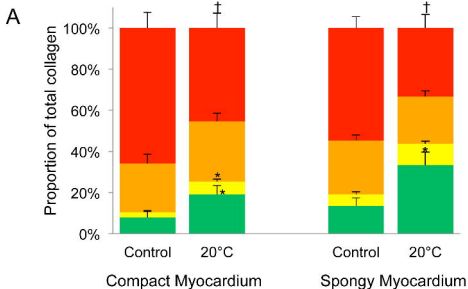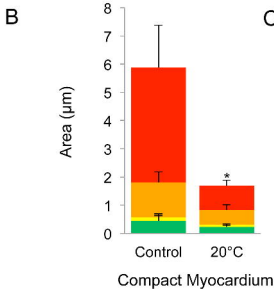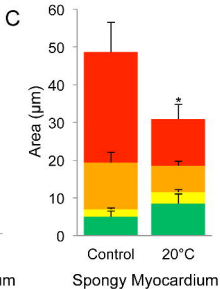



Figure 3. Johnson et al., submitted 2013

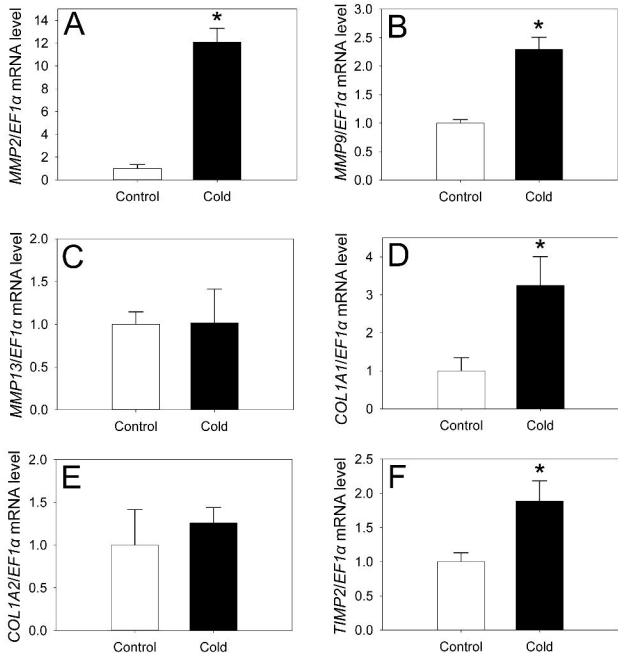



Figure 4. Johnson et al., submitted 2013

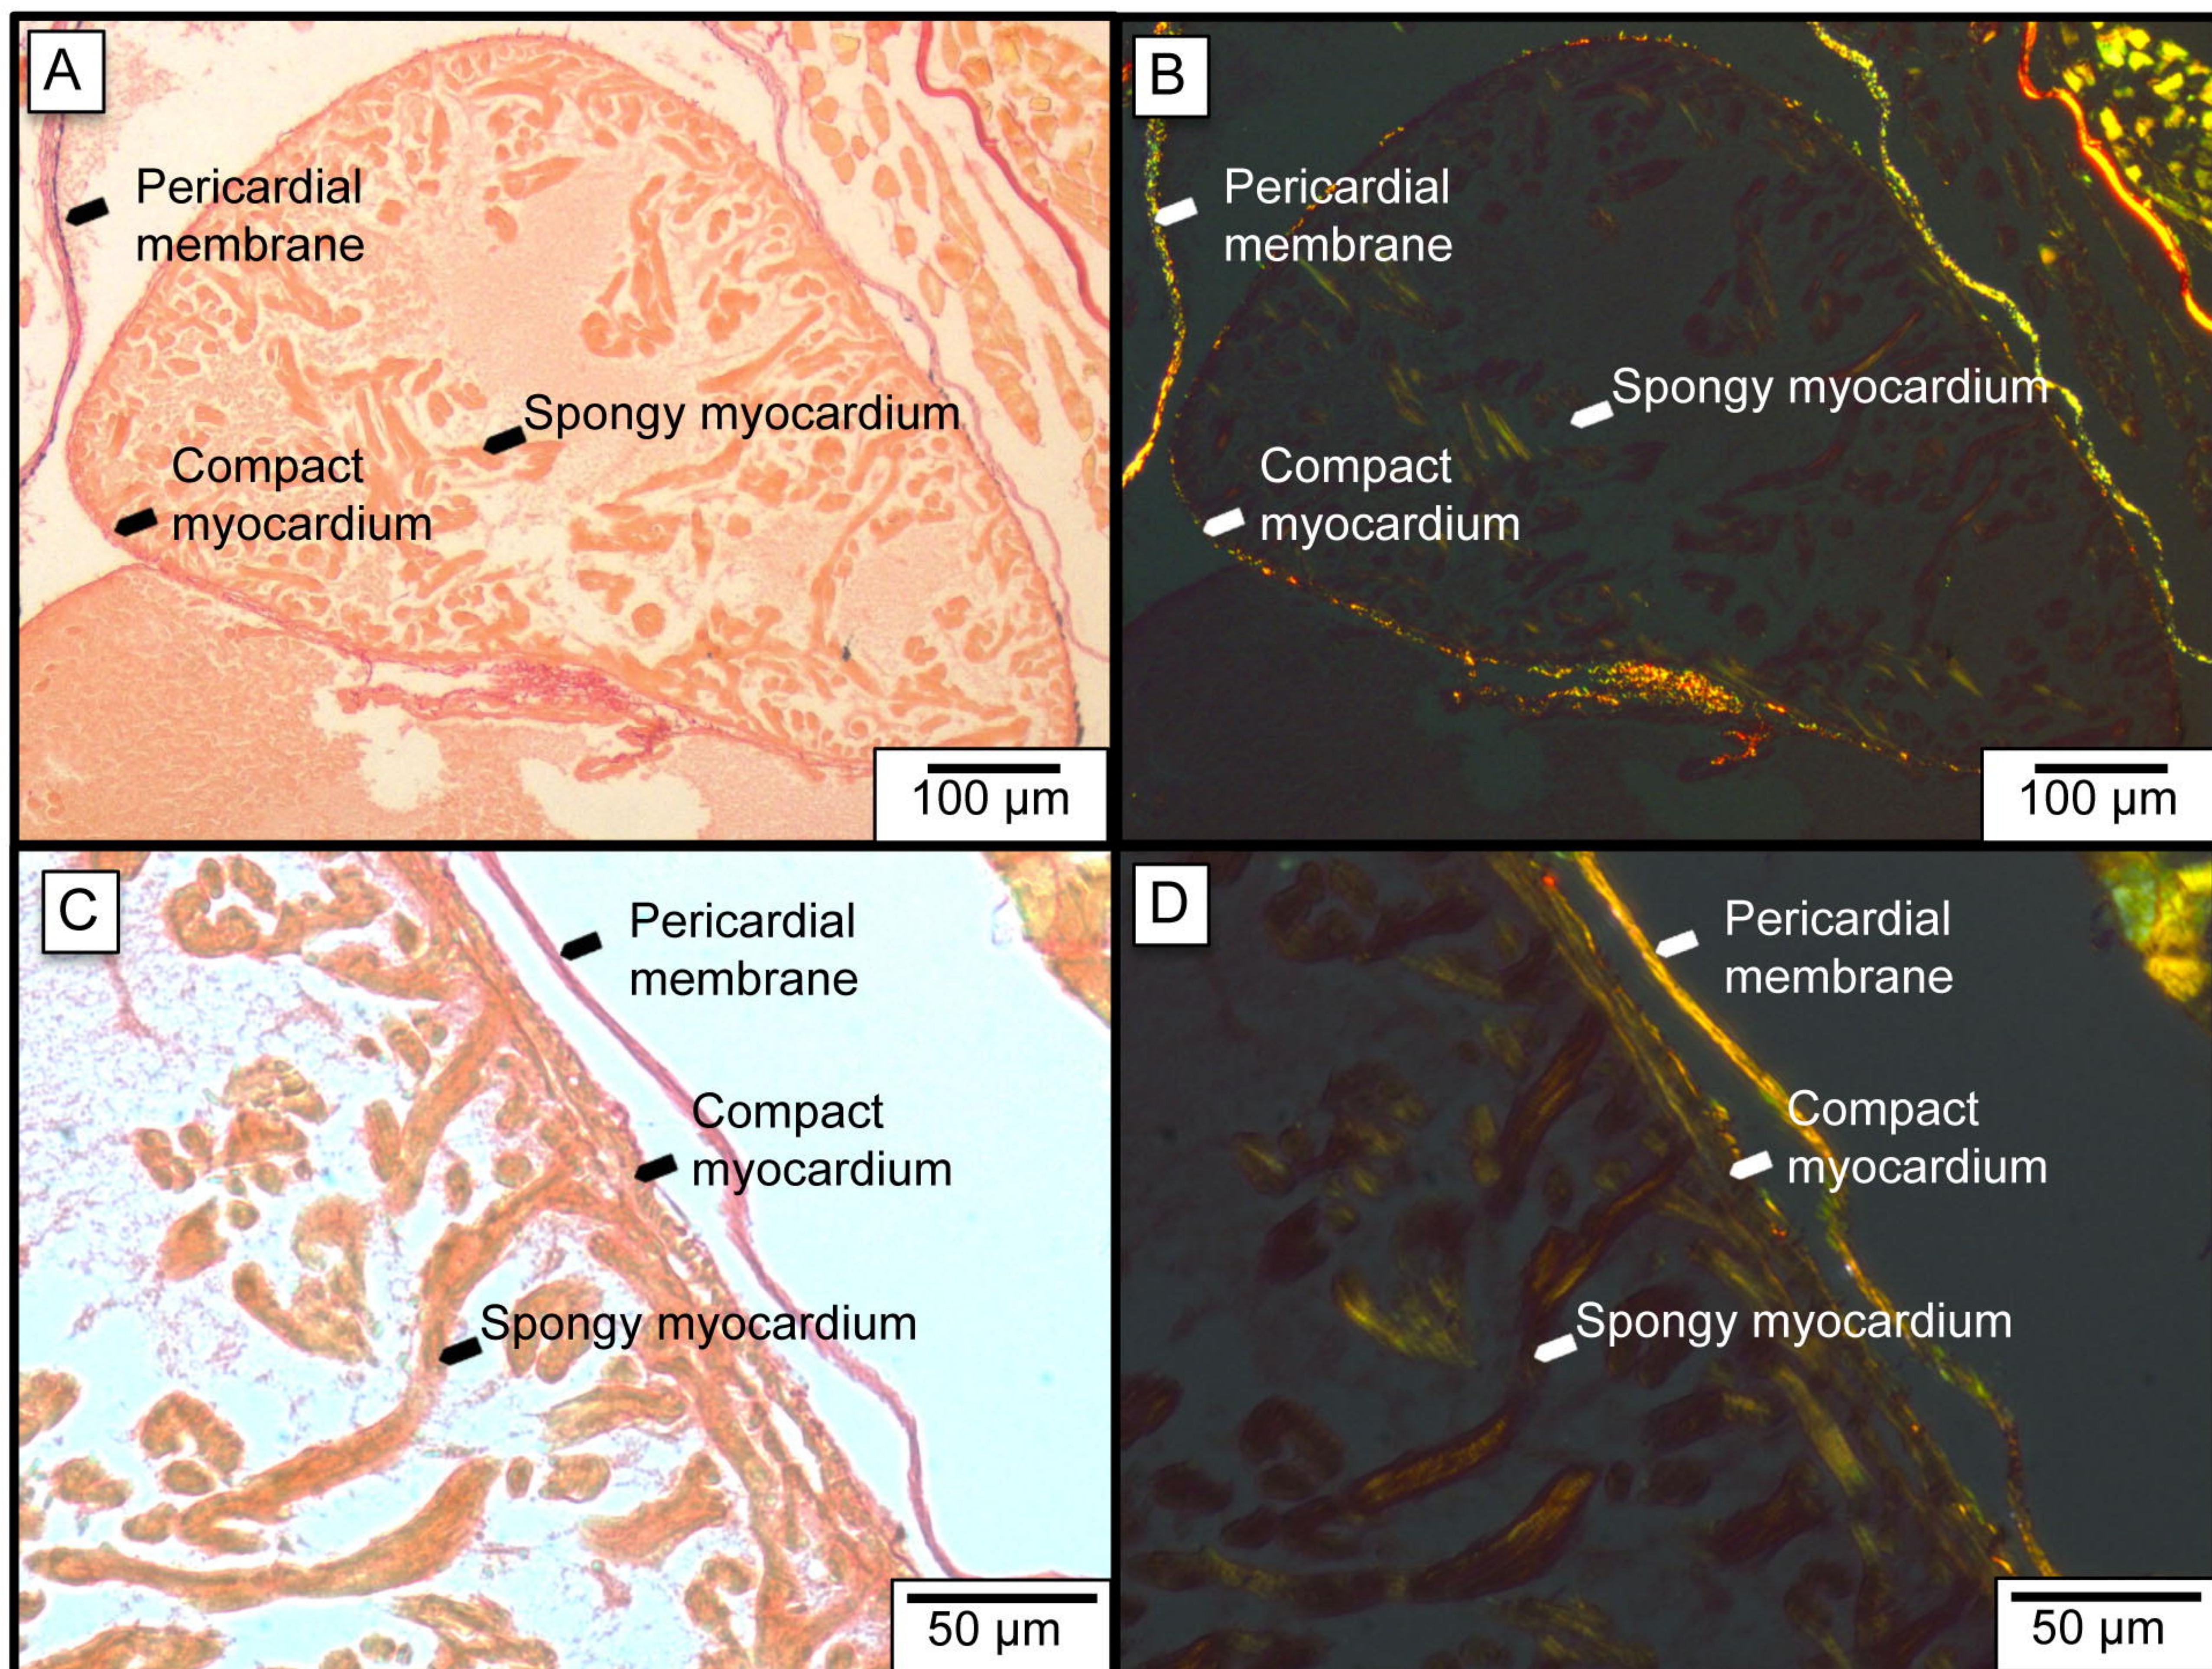

Source: https://cob.silverchair.com/jeb/article-pdf/doi/10.1242/jeb.101196/2037974/jeb_101196.pdf
